# Supplementary material for: Intent to have a second child among Chinese women of childbearing age following China’s new universal two-child policy: a cross-sectional study
Source: PubMed Central journal article supplement — BMJ Sex Reprod Health. 2019 Nov 21;46(1):59–66. doi: 10.1136/bmjsrh-2018-200197 (PMC6978559; doi:10.1136/bmjsrh-2018-200197), 2019-11-21
Supplement: bmjsrh-2018-200197supp001.pdf [file bmjsrh-2018-200197supp001.pdf]

**Supplemental Table 1. Fertility intent among 11,991 women of childbearing age in China.**

| Marital Status       | N    | Women intended to conceive further in future (%) |            |             |
|----------------------|------|--------------------------------------------------|------------|-------------|
|                      |      | Total                                            | In 2016    | In 2017     |
| Single               | 4441 | 1459 (32.9)                                      | 351 (29.2) | 1108 (34.2) |
| Married              | 7550 | 2855 (37.8)                                      | 903 (36.9) | 1952 (38.2) |
| No children          | 1044 | 674 (64.6)                                       | 228 (60.8) | 446 (66.7)  |
| One child            | 5049 | 2005 (39.7)                                      | 649 (37.4) | 1356 (40.9) |
| Two or more children | 1457 | 176 (12.1)                                       | 26 (7.7)   | 150 (13.4)  |
